# Supplementary material
Source: Elsevier journal article supplement (https://www.sciencedirect.com/science/article/pii/S157921291930271X)
Supplement: mmc1 [file S157921291930271X:mmc1.pdf]

## Supplementary material

### *CT scanning protocol*

Chronic HP patients underwent CT scanning on a Brilliance 16P scanner (Philips Medical Systems, Andover, MA) at suspended full-expiration and suspended full-inspiration after standardized breathing instructions, using a weight-based CT technique for dose minimization [39]. Subjects were instructed on the importance of breath-holding and immobility during scanning and on attaining reproducible maximum inspiratory and expiratory breath-holds. CT acquisition parameters for chronic HP patients are reported in **Table E1**. CT images were reconstructed with a smooth reconstruction filter (B filter).

**Table E1 - CT imaging parameters in chronic HP patients.**

|                      | Patients ≤80Kg |          | Patients >80Kg |          |
|----------------------|----------------|----------|----------------|----------|
|                      | Full-insp      | Full-exp | Full-insp      | Full-exp |
| Tube voltage (kVp)   | 120            | 90       | 140            | 120      |
| Tube current (mAs)   | 30             | 20       | 30             | 20       |
| Matrix               | 512x512        | 512x512  | 512x512        | 512x512  |
| Slice thickness (mm) | 1.0            | 1.0      | 1.0            | 1.0      |
